# Supplementary material for: Novel advancements in protection of steel surfaces using polystyrene supported nanoparticles of metallic zinc as sacrificial corrosion inhibitors
Source: Royal Society of Chemistry journal article supplement (doi:10.1039/d4nj01777c), 2024-01-01

### Supplementary File

**Figure S1:** Variation in weight loss of carbon steel coupons (left side) and corrosion inhibition (right side) versus the testing time; [a] in pure water, [b] in formation water, [c] in diesel fuel and [d] in sulfuric acid.

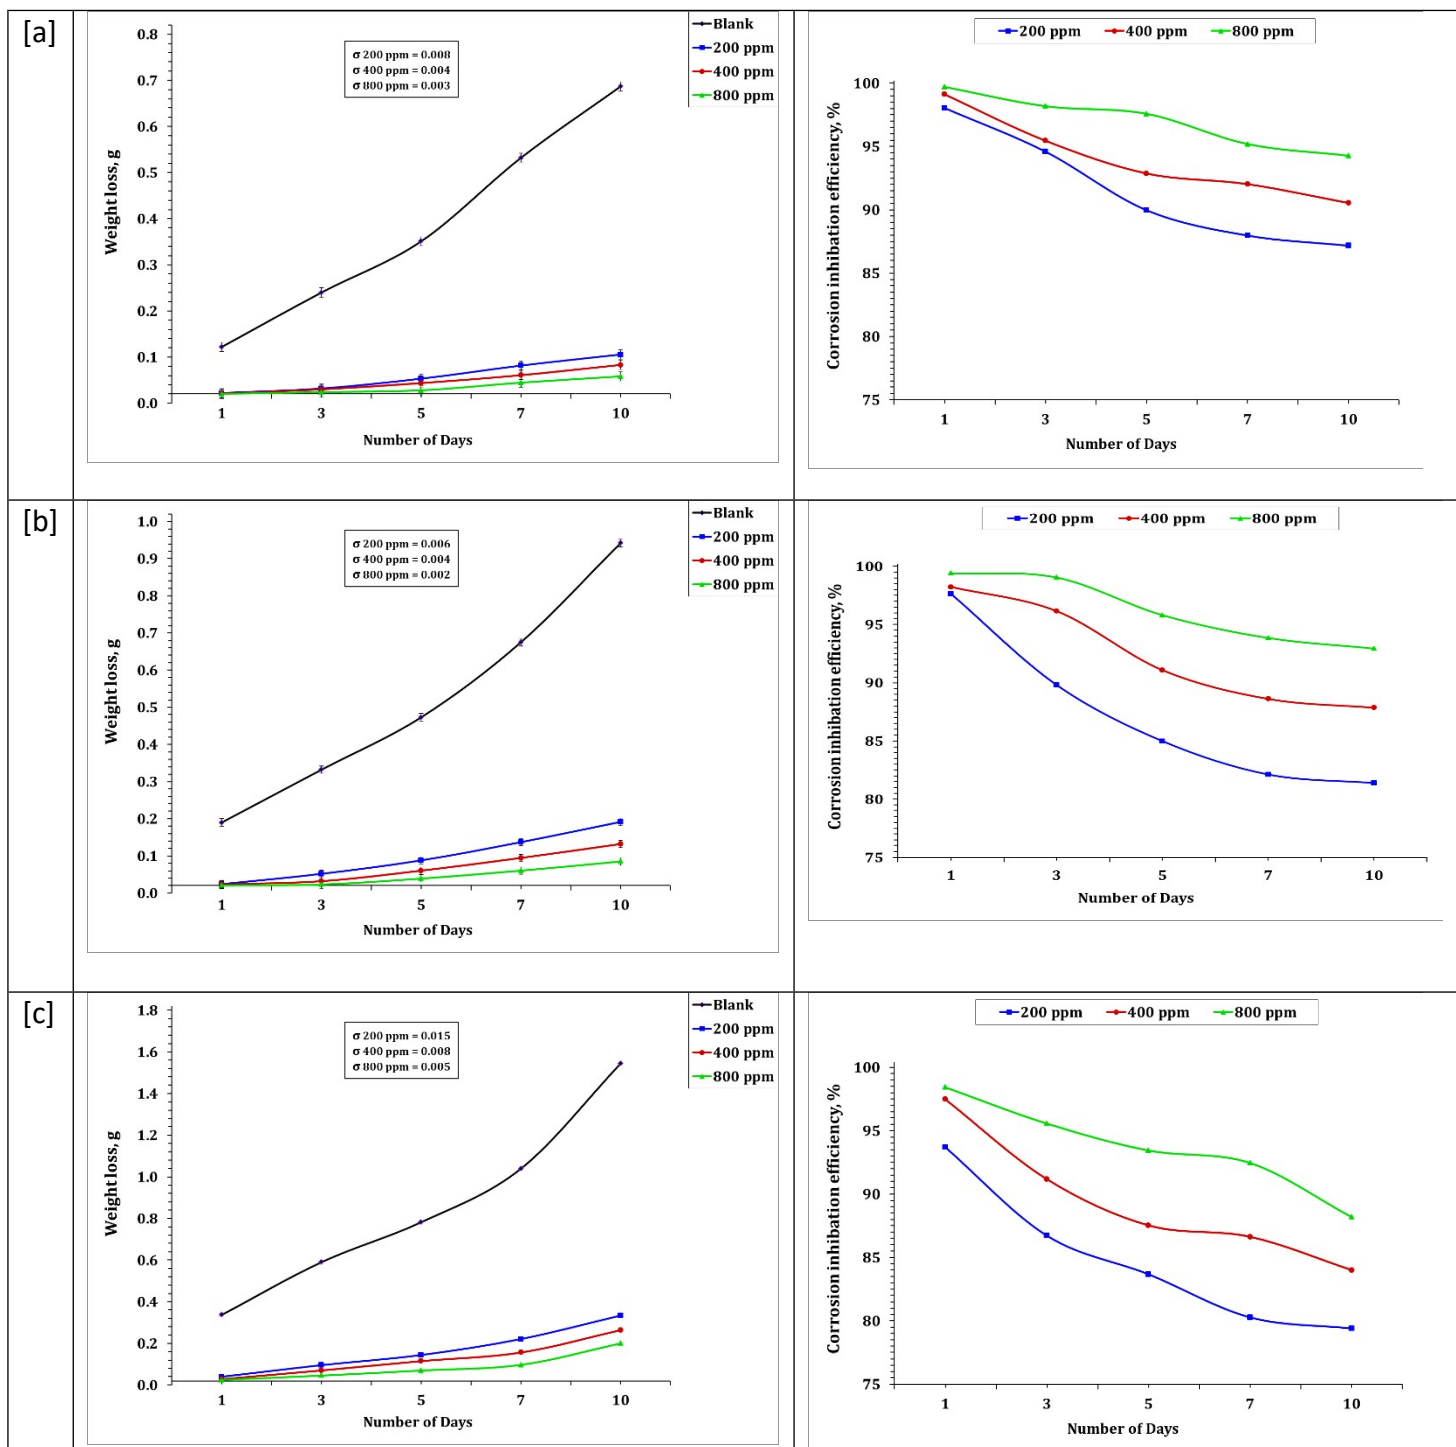

[d]

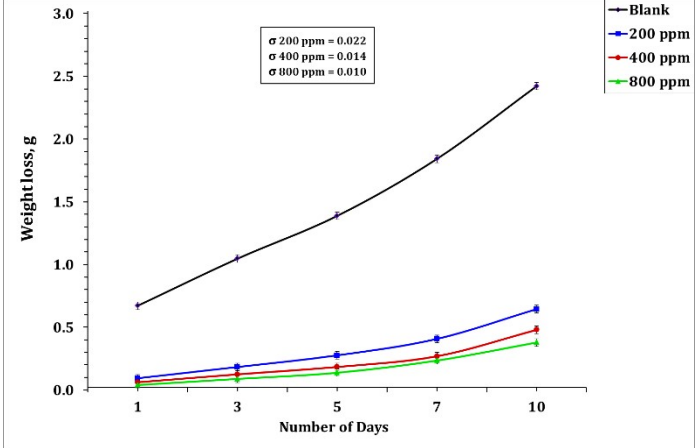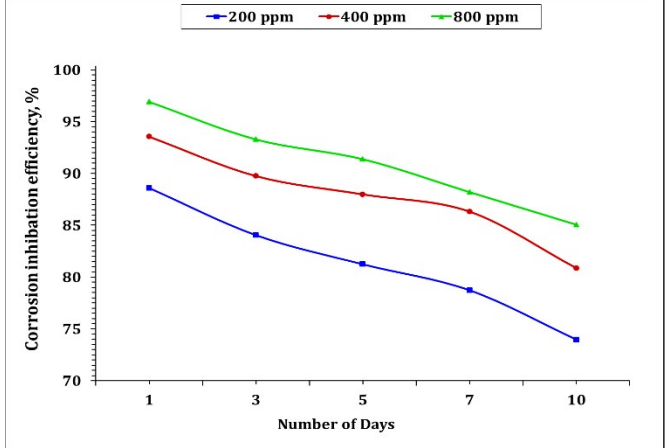

**Figure S2:** Variation in weight loss of carbon steel coupons (left side) and corrosion inhibition (right side) versus the testing time at different temperature; [a] in pure water, [b] in formation water, [c] in diesel fuel and [d] in sulfuric acid.

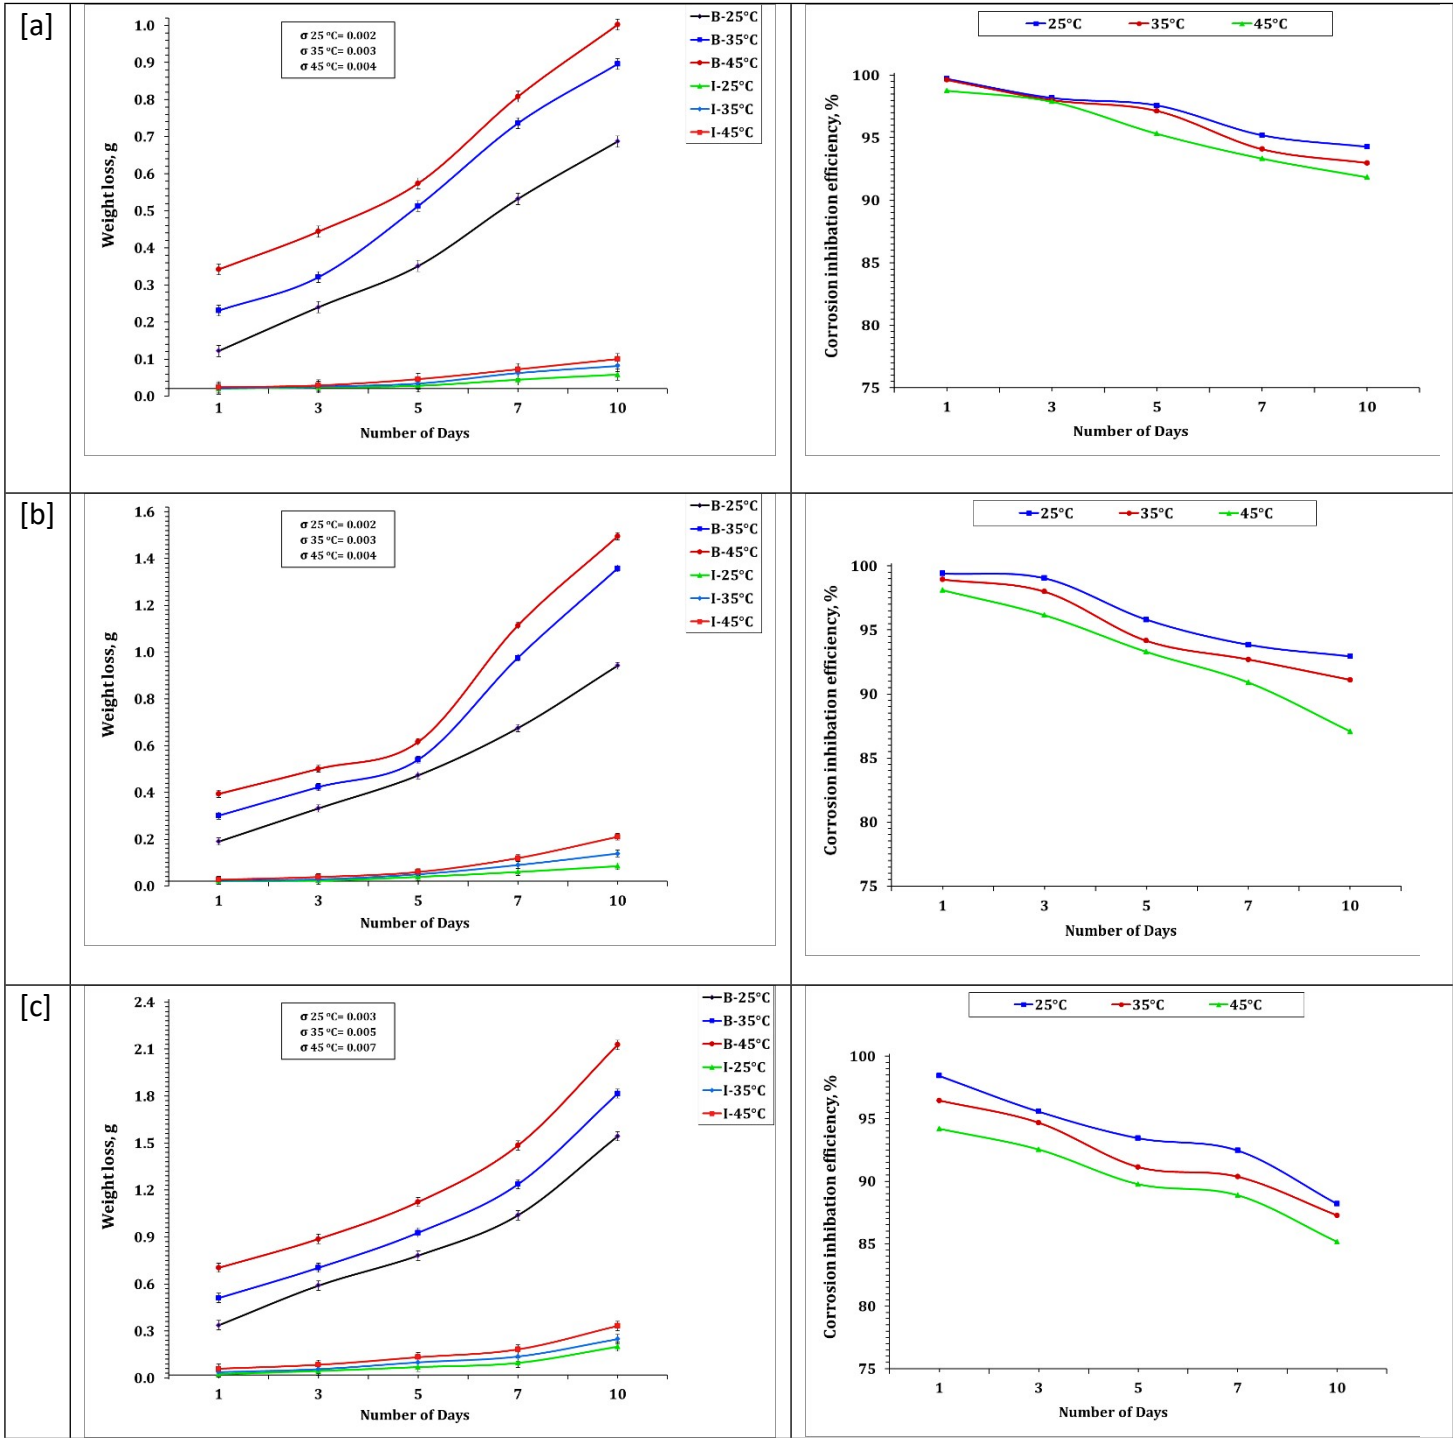

[d]

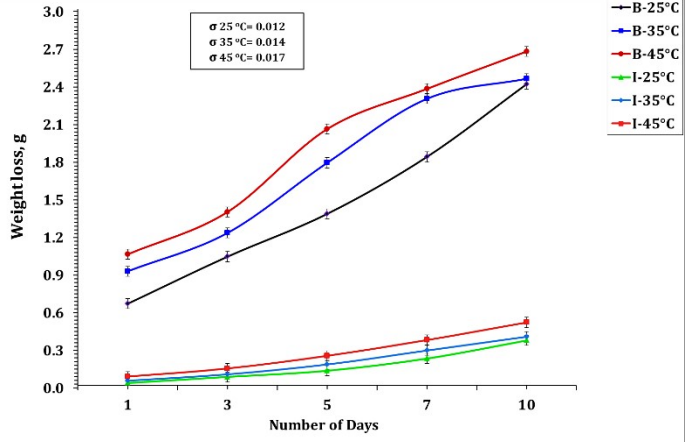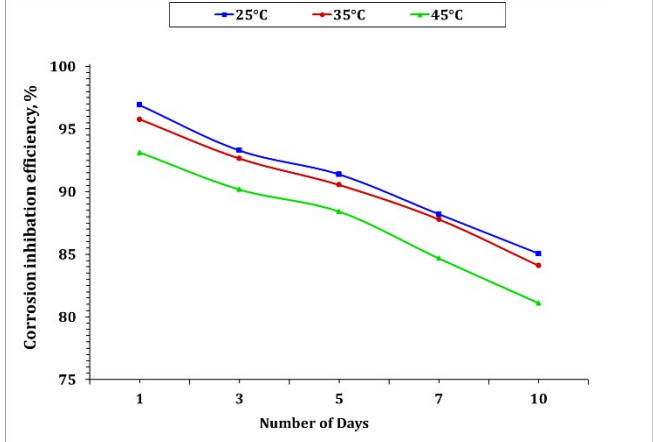

Supplement: d4nj01777c1.pdf [file d4nj01777c1.pdf]
